# Supplementary material
Source: PubMed Central journal article supplement (PMC9580265)
Supplement: NIHMS1836157-supplement-Supplemental_Table_1.pdf [file NIHMS1836157-supplement-Supplemental_Table_1.pdf]

<!--Col Count:10-->Supplemental Table 1. Interaction between Psychosocial Resources and Time

|                              | Model 1  |      | Model 2  |      | Model 3  |      |
|------------------------------|----------|------|----------|------|----------|------|
| <u>Fixed Effects</u>         | b        | SE   | b        | SE   | b        | SE   |
| Time                         | -0.06*   | 0.02 | 0.01     | 0.03 | -0.02    | 0.03 |
| 65-74 years old <sup>a</sup> | -0.55*** | 0.11 | -0.55*** | 0.11 | -0.55*** | 0.11 |
| 75+ years old <sup>a</sup>   | -0.71*** | 0.14 | -0.69*** | 0.14 | -0.70*** | 0.14 |
| 65-74 years old-x-time       | 0.04*    | 0.02 | 0.04*    | 0.02 | 0.04*    | 0.02 |
| 75+ years old-x-time         | 0.08***  | 0.02 | 0.08**   | 0.02 | 0.08***  | 0.02 |
| Hope                         | -0.18*** | 0.03 | -0.15*** | 0.02 | -0.15*** | 0.02 |
| Hope-x-time                  | 0.01     | 0.01 |          |      |          |      |
| Purpose in life              | -0.30*** | 0.04 | -0.27*** | 0.05 | -0.30*** | 0.04 |
| Purpose-x-time               |          |      | -0.01    | 0.01 |          |      |
| Religiosity                  | -0.01    | 0.03 | -0.01    | 0.03 | -0.01    | 0.04 |
| Religiosity-x-time           |          |      |          |      | 0.00     | 0.01 |
| Constant                     | 3.59***  | 0.22 | 3.36***  | 0.23 | 3.47***  | 0.23 |
| <u>Random Effects</u>        |          |      |          |      |          |      |
| Time variance                | -2.99*** | 0.46 | -3.09*** | 0.56 | -3.03*** | 0.5  |
| Constant variance            | 0.22***  | 0.03 | 0.22***  | 0.03 | 0.22***  | 0.03 |
| Residual variance            | 0.28***  | 0.02 | 0.28***  | 0.02 | 0.28***  | 0.02 |

Note: <sup>a</sup>reference = 51-64 years old; \*p<.05, \*\*p<.01, \*\*\*p<.001. Models adjust for gender, foreign-born status, marital status, education, poverty status, employment, and indicator for missing depressive symptoms data.
